# Supplementary material
Source: HighWire-hosted journal article supplement (https://care.diabetesjournals.org/content/suppl/2008/08/13/dc08-0706)

# Coronary artery disease events

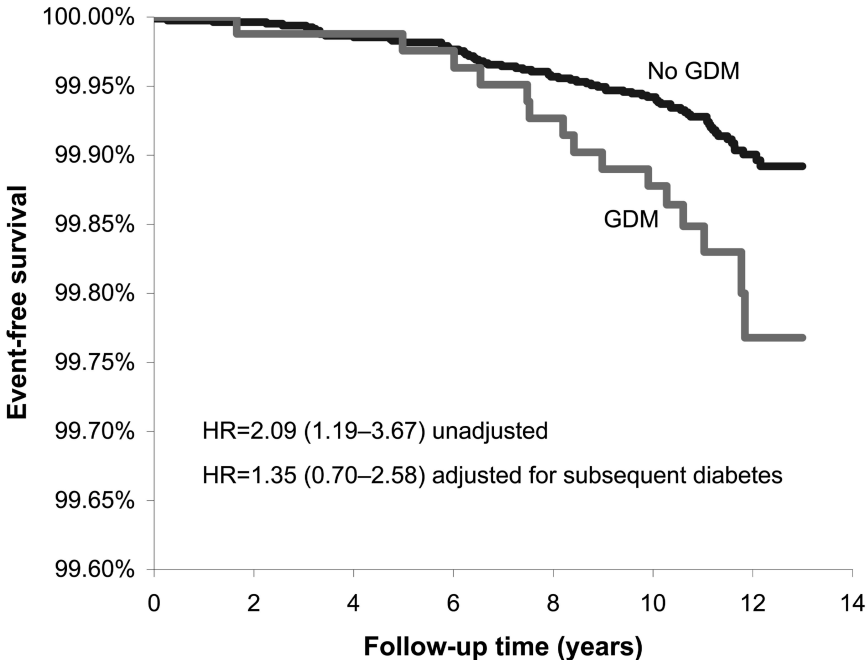

No. at risk

|        |        |        |        |        |        |        |        |
|--------|--------|--------|--------|--------|--------|--------|--------|
| GDM    | 8,191  | 8,188  | 8,180  | 8,174  | 8,164  | 8,148  | 2,711  |
| No GDM | 81,262 | 81,205 | 81,154 | 81,079 | 80,979 | 80,867 | 27,000 |

Supplement: DC08-0706Fig1b.pdf [file DC08-0706Fig1b.pdf]
